# Supplementary material
Source: PubMed Central journal article supplement (PMC2906863)
Supplement: 0913582107_pnas.200913582SI.pdf [file 0913582107_pnas.200913582SI.pdf]

# Supporting Information

## Means and Passarelli 10.1073/pnas.0913582107

### SI Materials and Methods

**Viruses and Insects.** Bacmids AcBAC and AcBAC-vfgfKO have been described (1). Viruses were titered in TN-368 cells (2) by TCID50. *T. ni* larvae were purchased from Benzon Research and reared at 27 °C with a 12-h light/dark cycle.

**Inoculation of *T. ni* Larvae.** *T. ni* were starved for 8 h, and within 2 h after molting into the fourth instar, infected with 500 occlusions (1  $\mu$ L) of AcBAC or AcBAC-vfgfKO in a 10% sucrose solution. Early fifth instar *T. ni* were infected intrahemocoelically by injecting 10 plaque-forming units (PFU) of AcBAC or AcBAC-vfgfKO BV between the first pair of prolegs at the third abdominal segment. After infection, each larva was separated, and at various times p.i. cohorts of 10–12 insects were killed and processed.

**Preparation of Larvae for Immunostaining.** Larvae were infected and dissected in PBS (3). Midguts and fat body were removed and fixed overnight in 4% paraformaldehyde at 4 °C. Samples were then placed in fresh fixative for 1 h at room temperature. After fixation, tissues were washed 4 $\times$  in PBS and permeabilized for 30 min with PBS and 0.1% Triton X-100. Samples were washed (4  $\times$  15 min) and incubated with PBS containing 10% FBS overnight at 4 °C to block nonspecific antibody binding, followed by 1 h at room temperature in fresh blocking solution. Tissues were then immunostained as described below.

**Immunostaining of Tissues and Immunoblotting of Lysates.** Antibody or antisera was incubated with tissues in PBS containing 10% FBS overnight at 4 °C. The next day, samples were washed (4  $\times$  15 min) in PBS and 0.1% Triton X-100 and incubated with secondary antibodies for 2 h at room temperature in the dark. Samples were then washed with PBS for 30 min, followed by 4  $\times$  15 min additional washes. After washing, tissues were mounted with Fluoromount G (Electron Microscopy Sciences) on slides and allowed to dry for 30 min in the dark, before imaging using a Zeiss LSM 5 PASCAL (laser scanning confocal microscope). The images shown are representative of the population of cells or tissues from independent experiments.

The following pairs of antibodies were used: polyclonal anti-laminin (Sigma) at 1:100, followed by secondary anti-rabbit ribulose-5-phosphate-3-epimerase (RPE) (Sigma) at 1:2,000; polyclonal anti-active DrICE (4) at 1:100, followed by secondary anti-rabbit RPE at 1:2,000; polyclonal anti-collagen type I (Abcam) at 1:1,000, followed by secondary anti-rabbit RPE at 1:2,000; monoclonal anti-GFP primary antibody (Clontech) (1:100), followed by secondary anti-mouse (1:2,000) FITC conjugated (Sigma).

Double-antibody labeling was performed as described for single-antibody stains but using two antibodies, followed by mouse and rabbit secondary antibodies coincubated 2 h at room temperature. Other antibodies used include monoclonal antiphosphotyrosine PY20 at 1:1,000 (Southern Biotechnology Associates, Inc.), anti-CM1 at 1:100 (Cell Signaling), and secondary antibodies anti-rabbit IgG-RPE, anti-mouse IgG-RPE (Southern Biotechnology Associates, Inc.), and anti-mouse IgG-FITC, at 1:5,000 dilution (Sigma). For experiments using two antibodies (i.e., active DrICE and GFP) and different visualization, one of the primary antibodies was FITC conjugated using the FITC antibody labeling kit (Thermo Scientific) as described by the manufacturer.

For immunoblotting, cohorts of 4–5 *T. ni* were killed at various times p.i., and midguts were dissected and placed in 100  $\mu$ L SDS Laemmli buffer. Samples were then homogenized and sonicated for 15 s with 5-s bursts/10-s breaks and centrifuged at 17,900  $\times$  g for 15

min. Supernatant (80  $\mu$ L) was then transferred to a fresh 1.5-mL tube, and 40  $\mu$ L were analyzed by immunoblotting. Proteins were resolved by SDS/PAGE (15%). The resolved proteins were transferred to a PVDF membrane (Pierce) and immunodetected accordingly. Virus-infected cells were determined with anti-GFP monoclonal at 1:100 and anti-mouse IgG-HRP (horseradish peroxidase) (1:2,000). Type IV collagen was detected with anti-type IV collagen polyclonal at 1:100 and anti-rabbit IgG-HRP at 1:2,000. Laminin was detected with an anti-laminin polyclonal at 1:100 and anti-rabbit IgG-HRP (1:2,000). GAPDH was detected using a polyclonal anti-GAPDH (Abcam) at 1:1,000, followed by anti-rabbit IgG-HRP (1:2,000). Immunoreactive proteins were visualized with SuperSignal West Pico Chemiluminescent Substrate (Thermo Scientific).

To determine direct cleavage of laminin and type IV collagen by caspases, recombinant human laminin (Abcam) or type IV collagen (Abcam) was mixed with active effector caspase DrICE (5) or active initiator caspase DRONC (5) in 100  $\mu$ L caspase buffer and incubated at 37 °C for 4 h. The caspase inhibitor zVAD-fmk (100  $\mu$ M) was used to confirm caspase-dependent cleavage. Samples were then analyzed by immunoblotting.

**Processing Tissues for Caspase and MMP Activity Assays.** To measure midgut caspase or MMP activity, 4–5 *T. ni* midguts and associated trachea were dissected and placed in 100  $\mu$ L caspase buffer [50 mM Hepes (pH 7.5), 100 mM NaCl, 1 mM EDTA, 0.1% CHAPS, 10% sucrose, 5 mM DTT]. Samples were processed as described for immunoblotting. Protein (10  $\mu$ g/100  $\mu$ L caspase buffer) was mixed with 0.2  $\mu$ M Ac-DEVD-afc. In some assays, 0.2 mg of procaspase-3 was mixed with 0.4 mg of active MMP-2 or MMP-9 (Calbiochem) in 100  $\mu$ L caspase buffer and incubated at 37 °C for 4 h before measuring caspase activity.

When caspase or MMP inhibitors were used, larvae were fed 100  $\mu$ M of zVADfmk (MP Biomedicals) or GM6001 (Calbiochem), the broad spectrum caspase or MMP inhibitor, respectively, in a 10% sucrose solution with or without virus. After feeding, larvae were processed as described previously, and cohorts of four or five were used for activity assays.

**Transmission Electron Microscope Sample Preparation.** At various times p.i., *T. ni* were killed, and midguts dissected and placed in fixative solution [2% paraformaldehyde, 2% glutaraldehyde in 0.1 M sodium cacodylate buffer (pH 7.2)] overnight at 4 °C with gentle rocking. Samples were then transferred to fresh fixative for an additional 2 h with gentle rocking at room temperature. After fixing, samples were washed 3  $\times$  5 min in 0.1 M sodium cacodylate buffer (pH 7.2) at room temperature. Samples were then postfixed in 1% osmium tetroxide (Ted Pella, Inc.) in 0.1 M sodium cacodylate buffer (pH 7.2) at room temperature for 2 h. After postfixing, samples were washed 3  $\times$  5 min in 0.1 M sodium cacodylate (pH 7.2) at room temperature and *en bloc* stained in 2% aqueous uranyl acetate at 4 °C overnight in the dark. The following day, samples were rinsed (3  $\times$  15 min) with water. Samples were then dehydrated (3  $\times$  5 min) with increasing concentrations of ethanol (30–100%) at room temperature and treated with acetone (2  $\times$  5 min). Samples were then infiltrated with EMBED 812/Araldite resin (Ted Pella, Inc.) at room temperature as follows: 3:1 acetone:resin for 30 min, 1:1 acetone:resin for 1 h, 1:3 acetone:resin overnight, 100% resin for 8 h, 100% resin overnight. Samples were then transferred to a mold and filled with fresh resin and oriented. Resin-containing samples were then polymerized at 65 °C for 24–48 h. Thin sections were cut with a glass knife and examined under a transmission electron microscope model LEM 2000 (International Scientific Instruments).









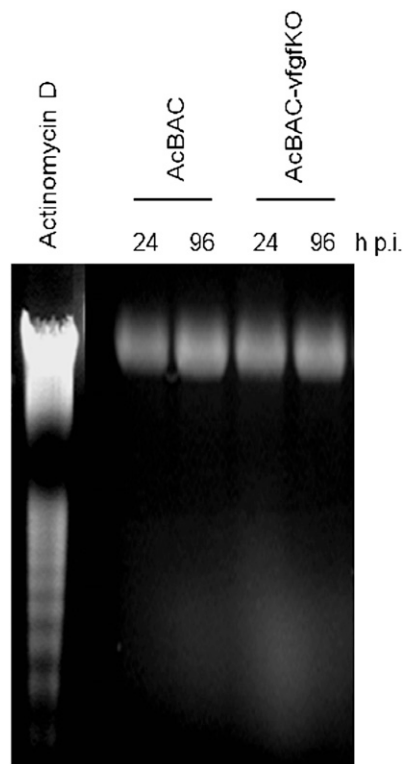

**Fig. S8.** Lack of DNA fragmentation in AcBAC- or AcBAC-vfgfKO-infected midguts. Larvae were either mock-infected or infected by feeding with either AcBAC or AcBAC-vfgfKO, and midguts were dissected at several times p.i. Mock-infected midguts were treated with actinomycin D (0.5  $\mu\text{g}/\text{mL}$ ) to induce apoptosis. Midgut DNA from the samples as indicated at the top was resolved by agarose gel electrophoresis and visualized with ethidium bromide as described previously (6).
